# Supplementary material for: Non-Invasive Prenatal Detection of Trisomy 21 Using Tandem Single Nucleotide Polymorphisms
Source: PLoS One. 2010 Oct 8;5(10):e13184. doi: 10.1371/journal.pone.0013184 (PMC2951898; doi:10.1371/journal.pone.0013184)
Supplement: Table S4 — Maternal plasma DNA analysis using Haplotype Ratio calculations. (0.06 MB DOC) [file pone.0013184.s008.doc]

**Table S4. Maternal plasma DNA analysis using Haplotype Ratio calculations.**

| **Sample #** | **Starting template (ng)** | **PCR**  **Method 1** | **Fetal (paternal) % in maternal plasma 2** | **HR3** | **95% confidence interval4** | **Fetal Karyotype** | **Chr21 call** | **Gestational week (weeks)** | **Maternal Age (years)** |
| --- | --- | --- | --- | --- | --- | --- | --- | --- | --- |
| FDT0601 | 3 | Direct PCR-Pfu | 7.38% | 1.21 | (1,1.65) | Normal | D21 | 9 | 35 |
| FDT0602 | 3 | Direct PCR-Pfu | 10.77% | 1.19 | (1.15,1.25) | T18 | D21 | 14.3 | 30 |
| **FDT0603** | **2** | **Direct PCR-Pfu** | **4.44%** | **2.29** | **(2.19,2.48)** | **T21** | **T21** | **35** | **26** |
| **FDT0604** | **3** | **Direct PCR-Pfu** | **1.60%** | **1.87** | **(1.67,2.29))** | **T21** | **T21** | **27.6** | **29** |
| **FDT0705** | **3** | **Direct PCR-Pfu** | **5.04%** | **2.09** | **(2.05,2.18)** | **T21** | **T21** | **25** | **42** |
| **FDT0706** | **5** | **MLA –Taq** | **3.29%** | **2.33** | **(2.19,2.62)** | **T21** | **T21** | **29.5** | **40** |
| **FDT0807** | **3** | **Direct PCR-Pfu** | **1.68%** | **2.29** | **(1.97,2.92)** | **T21** | **T21** | **31.3** | **33** |
| **FDT0808** | **3** | **Direct PCR-Pfu** | **7.12%** | **0.05** | **(0.03,0.11)** | **T21** | **T21** | **35.5** | **40** |
| FDT0809 | 3 | Direct PCR-Pfu | 5.46% | 1.29 | (1.07,1.72) | T18 | D21 | 12.7 | 43 |
| FDT0810 | 3 | Direct PCR-Pfu | 19.70% | 1.04 | (1.01,1.09) | Normal | D21 | 15 | 40 |
| FDT0812 | 5 | MLA –Taq | 8.00% | 1 | (0.98,1.06) | Normal | D21 | 12.6 | 38 |
| FDT0813 | 3 | MLA –Taq | 6.81% | 1 | (0.81,1.39) | Normal | D21 | 14.5 | 40 |
| FDT0816 | 4 | MLA –Taq | 7.32% | 0.9 | (0.62,1.47) | Normal | D21 | 26 | 25 |
| FDT0817 | 5 | MLA –Pfu | 24.05% | 1.04 | (1.01,1.1) | Normal | D21 | 13.5 | 30 |
| FDT0818 | 5 | MLA –Taq | 4.05% | 1.22 | (0.92,1.85) | Normal | D21 | 11.4 | 39 |
| FDT0821 | 3 | MLA –Taq | 2.93% | 1.06 | (1,1.19) | Normal | D21 | 11.4 | 28 |
| FDT0822 | 5 | MLA –Taq | 3.96% | 0.92 | (0.78,1.22) | Normal | D21 | 33.5 | 33 |
| FDT0824 | 5 | MLA –Pfu | 11.71% | 1.35 | (1.34,1.37) | Normal | D21 | 15.4 | 41 |
| FDT0827 | 4 | MLA –Taq | 9.20% | 0.95 | (0.88,1.09) | Normal | D21 | 30.2 | 32 |
| FDT0832 | 4 | MLA –Taq | 3.67% | 1.23 | (1.16,1.36) | Normal | D21 | 14.6 | 37 |
| FDT0833 | 4 | MLA –Taq | 7.00% | 1.46 | (1.42,1.53) | Normal | D21 | 36.1 | 24 |
| FDT0834 | 4 | MLA –Taq | 5.94% | 1.06 | (0.79,1.61) | Normal | D21 | 13.4 | 33 |
| **FDT0835** | **5** | **MLA –Taq** | **6.82%** | **2.08** | **(1.85,2.54)** | **T21** | **T21** | **20.3** | **22** |
| FDT0836 | 4 | MLA –Taq | 7.32% | 1.29 | (1.1,1.68) | Normal | D21 | 11.5 | 32 |
| FDT0837 | 5 | MLA –Pfu | 4.23% | 1.02 | (0.96,1.13) | Normal | D21 | 13.3 | 33 |
| FDT0839 | 5 | MLA –Taq | 13.74% | 0.9 | (0.83,0.92) | Normal | D21 | 19.6 | 29 |
| FDT0840 | 5 | MLA –Taq | 9.67% | 1.2 | (1.1,1.4) | Normal | D21 | 17 | 32 |
| HR, Haplotype Ratio; MLA-Taq, Multiplexed Linear Amplification using Taq polymerase; Direct PCR-Pfu, Direct PCR using Pfu polymerase; T21, Trisomy 21; D21, Disomy 21.  1Direct PCR-Pfu indicates that Direct PCR or Sequence specific PCR was performed using high fidelity Pfu Ultra II fusion enzyme. MLA- Taq indicates that multiplexed linear amplification was performed using Hot star Taq enzyme followed by sequence specific PCR using Pfu Ultra II fusion enzyme. And MLA- Pfu indicates that MLA amplification was performed using Pfu Ultra II enzyme followed by sequence specific PCR also using Pfu Ultra II fusion enzyme.  2Fetal % due to paternal contribution is calculated by using the formula listed under section “Tandem SNP analysis permits fetal chromosomal dosage determination in maternal plasma”.  3Informative assay used to calculate the HR can be found in Table S2.  495% CI was calculated using the mean ± 1.96 SD/ √3  Bold fonts indicate the fetal T21 subjects/samples. | | | | | | | |  |  |
